# Supplementary material for: SRSF6 Regulates the Alternative Splicing of the Apoptotic Fas Gene by Targeting a Novel RNA Sequence
Source: MDPI journal article supplement (doi:10.3390/cancers14081990), 2022-04-14

Figure S1. RT-PCR analysis with RNAs extracted from untreated, non-silencing shRNA treated, SRSF6-shRNAs

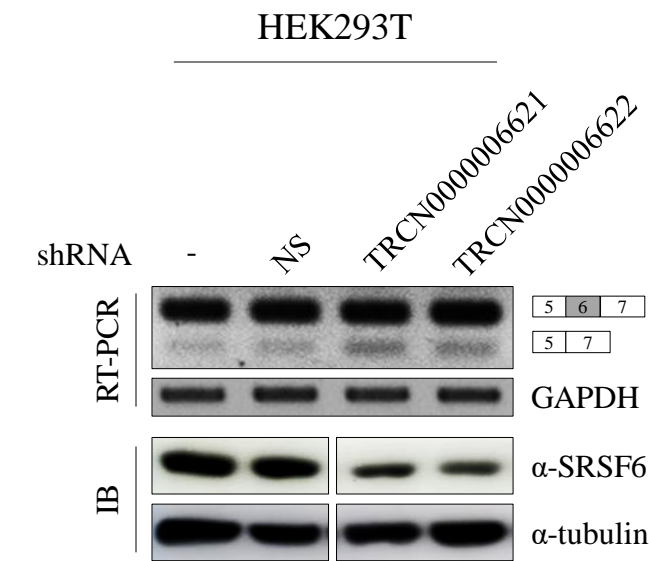

Figure S2. Uncropped original western blots

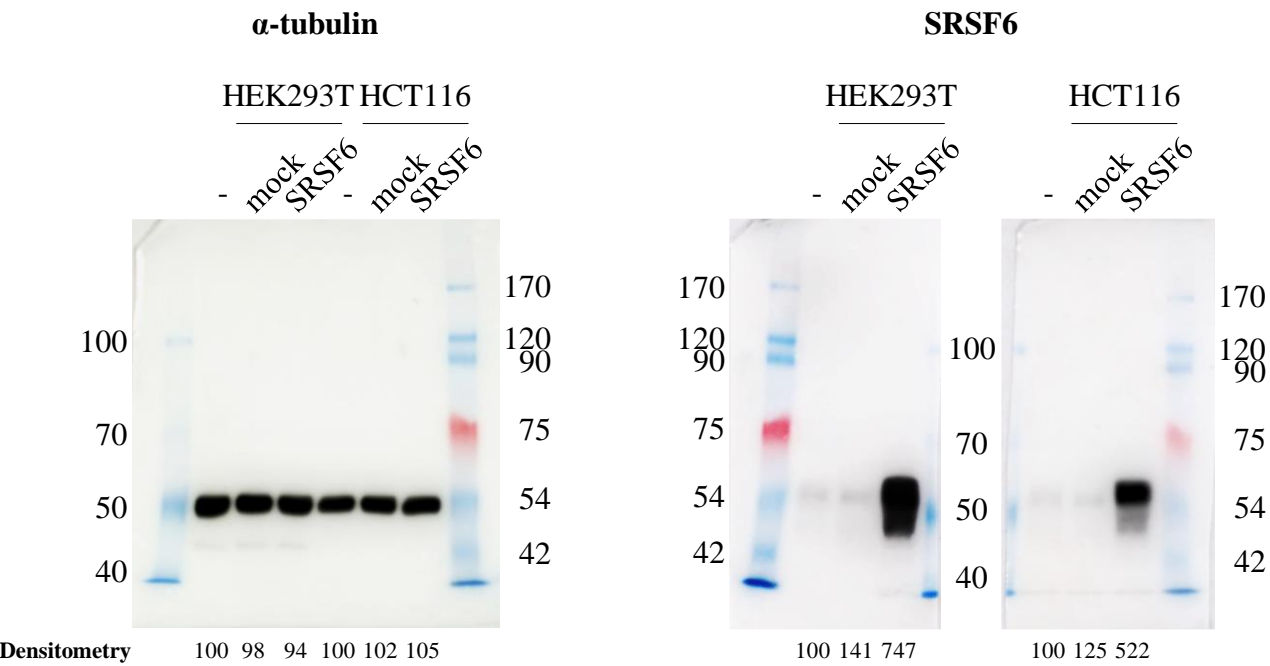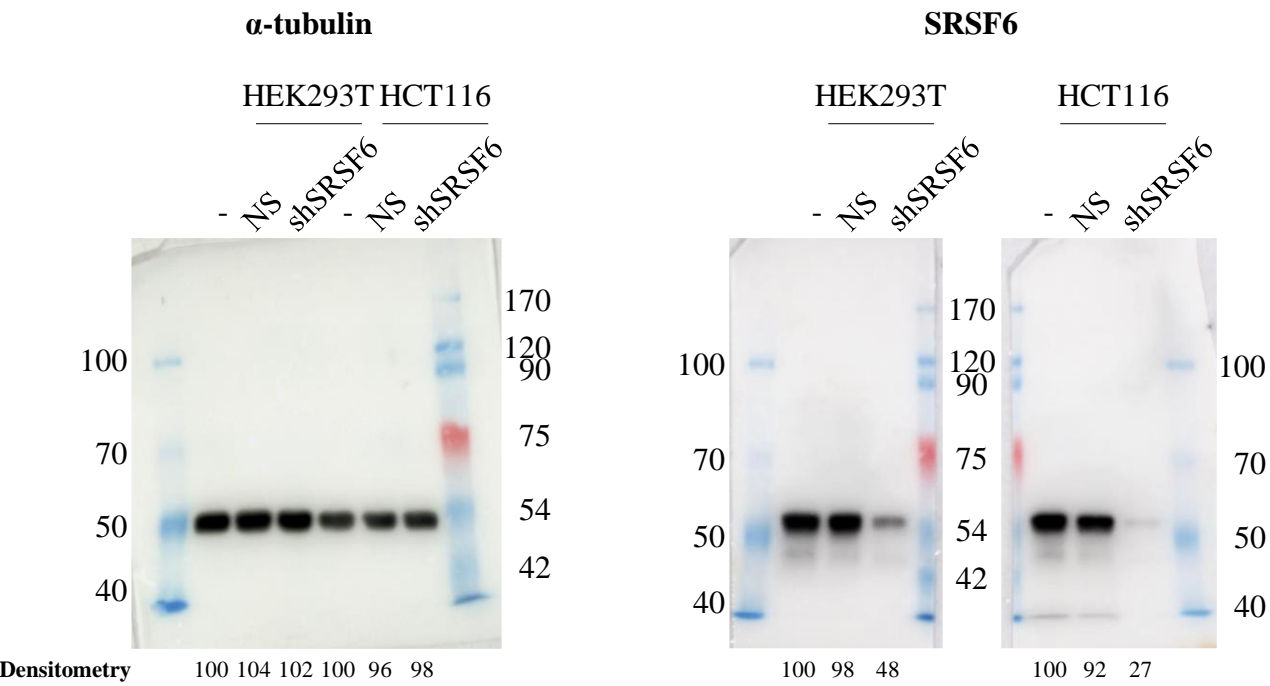

## Densitometry

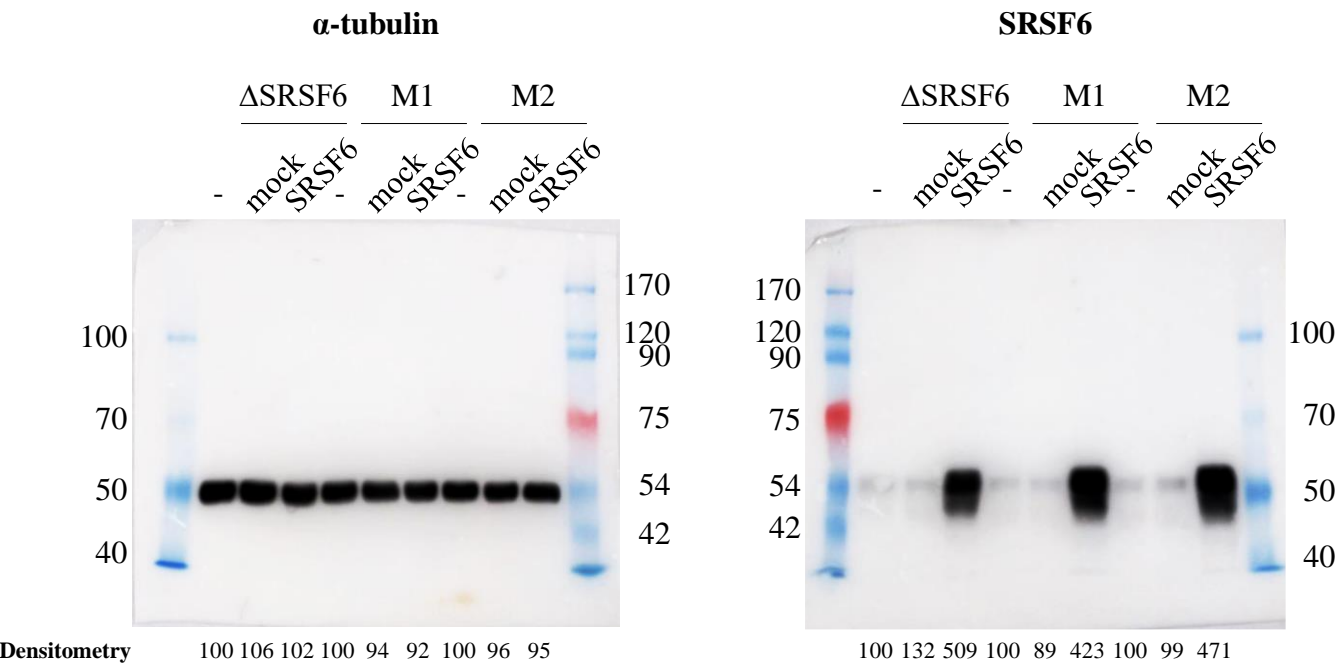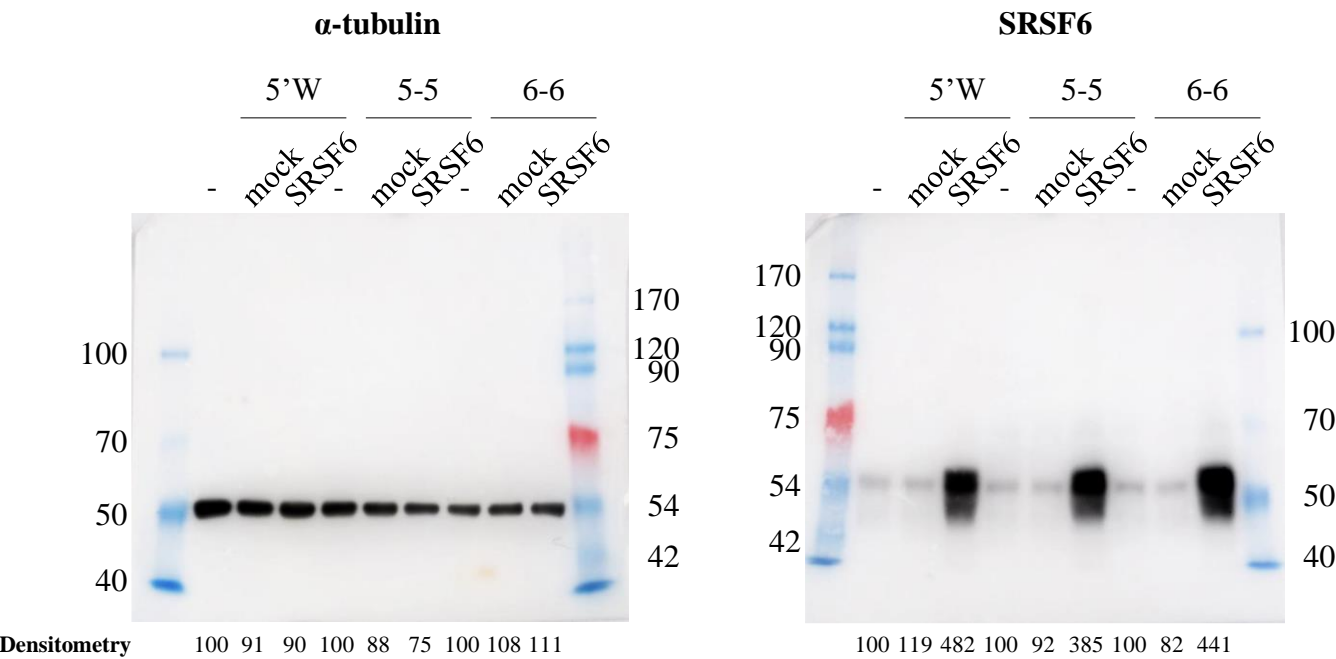

Supplement: s1 [file s1]
